# Supplementary material
Source: PubMed Central journal article supplement (PMC2438466)
Supplement: tpc.107.057877_1.pdf [file tpc.107.057877_1.pdf]

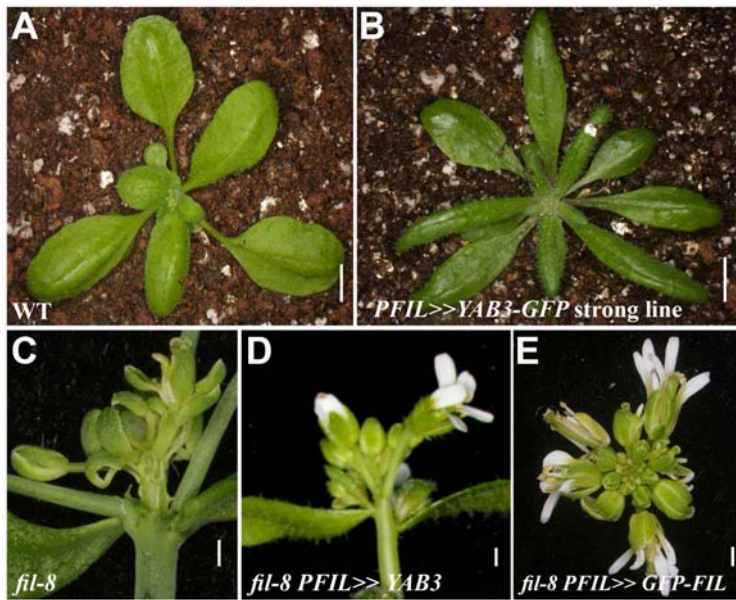

**Supplemental Figure 1. Equivalence of FIL and YAB3 proteins.**

**A-B:** Narrow leaves are induced when promoter *FIL* drives expression of a strong *OP:YAB3-GFP* line in a wild-type background. **C-E:** Complementation of the *fil-8* mutant (**C**) by a weak *OP:YAB3* responder line (**D**) or an *OP:GFP-FIL* intermediate line (**E**) trans activated by the promoter *FIL* driver. Bars are 1cm in (**A-B**) and 1mm in (**C-E**).

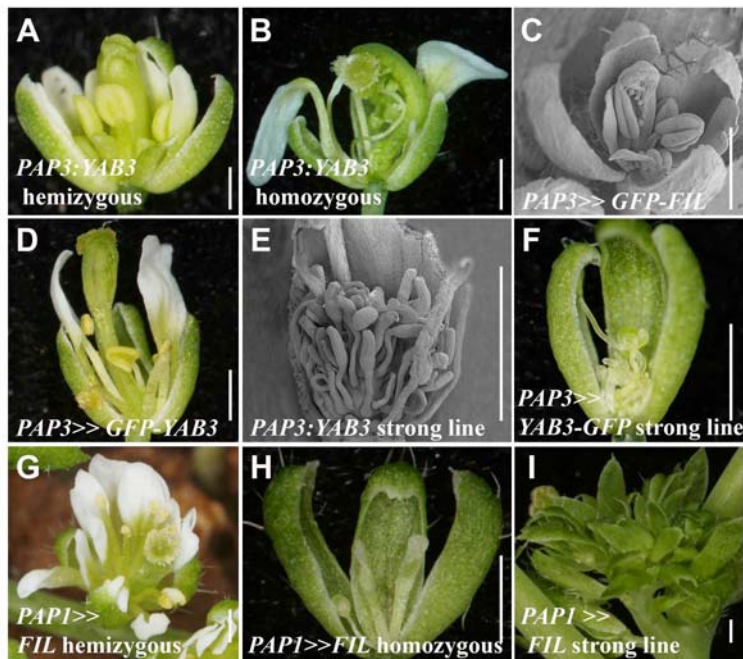

**Supplemental Figure 2. Phenotypic range of effects induced by ectopic expression of various forms of YAB1.**

**A-F:** Side view of *Arabidopsis* flowers with ectopic expression of YAB1 constructs driven by the *APETALA3* (*AP3*) promoter. Hemizygous (**A**) and homozygous (**B**) flowers from a weak *PAP3:YAB3* direct fusion line. Flowers with trans-activation of intermediate *OP:GFP-FIL* (**C**) and intermediate *OP:GFP-YAB3* (**D**) responder lines. Flowers of strong *PAP3:YAB3* (**E**) and *PAP3>>YAB3-GFP* lines (**F**). **G-I:** Side view of flowers with ectopic expression of YAB1 constructs mediated by the *APETALA1* (*API*) promoter. Flowers from plants expressing a weak *OP:FIL* line trans-activated by the *PAP1:LhG4* driver promoter in a hemizygous (**G**) or homozygous (**H**) state. Side-view of an inflorescence of a strong *PAP1>>FIL* line (**I**).

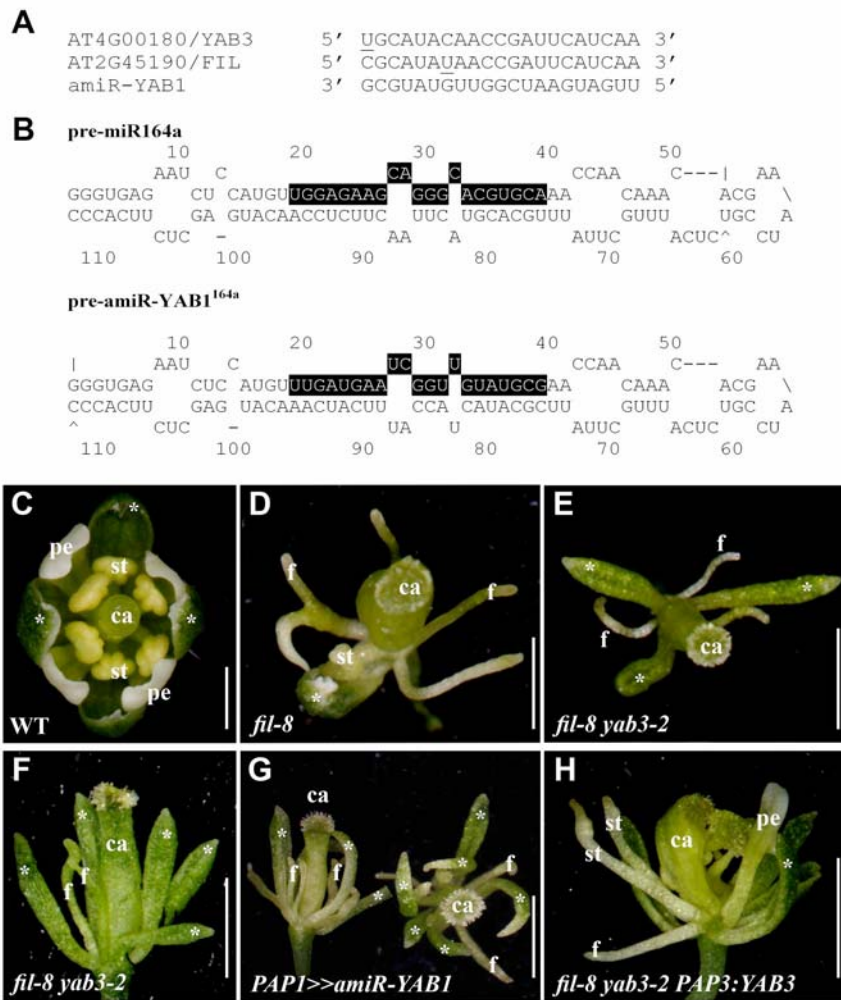

**Supplemental Figure 3. Sequential effects of YAB1 revealed by the use of a synthetic miRNA targeting the YAB1 genes.**

**A-B:** Conceptual design of the *amiR-YAB1*. (A) RNA alignment of *amiR-YAB1* and the complementary regions of *FIL* and *YAB3*. G-U wobbles between the *amiR-YAB1* and the target sequences are denoted by underlining the relevant nucleotide in the target sequence. (B) Theoretical representations of the pre-miR164a and pre-amiR-YAB1<sup>164a</sup> secondary structures. The miRNA sequence is highlighted. **C-H:** Effects of altered YAB1 levels on 2<sup>nd</sup>, 3<sup>rd</sup> and 4<sup>th</sup> whorl development. (C) Stereotypic organization of wild-type flower. Disrupted phylotactic patterns and formation of filamentous or chimeric organs characterize mature *fil-8* (D) and *fil-8 yab3-2* (E) flowers. (F) Side view of a mature *fil-8 yab3-2* mutant flower. Only 2 filamentous structures have developed in 2<sup>nd</sup> and 3<sup>rd</sup> whorls. (G) Side and aerial view of *PAP1>>amiR-YAB1* flowers. Only filamentous structures are present in the 2<sup>nd</sup> and 3<sup>rd</sup> whorls. (H) Side view of a *fil-8 yab3-2* mutant flower with ectopic expression of YAB3 in the 2<sup>nd</sup> and 3<sup>rd</sup> whorls. Carpel development is abnormal while stamen morphology is partially complemented. Petal development and number are only partially complemented. Bars are 1mm. \*- sepals, f- filaments, st- stamens, pe- petals, ca- carpels.

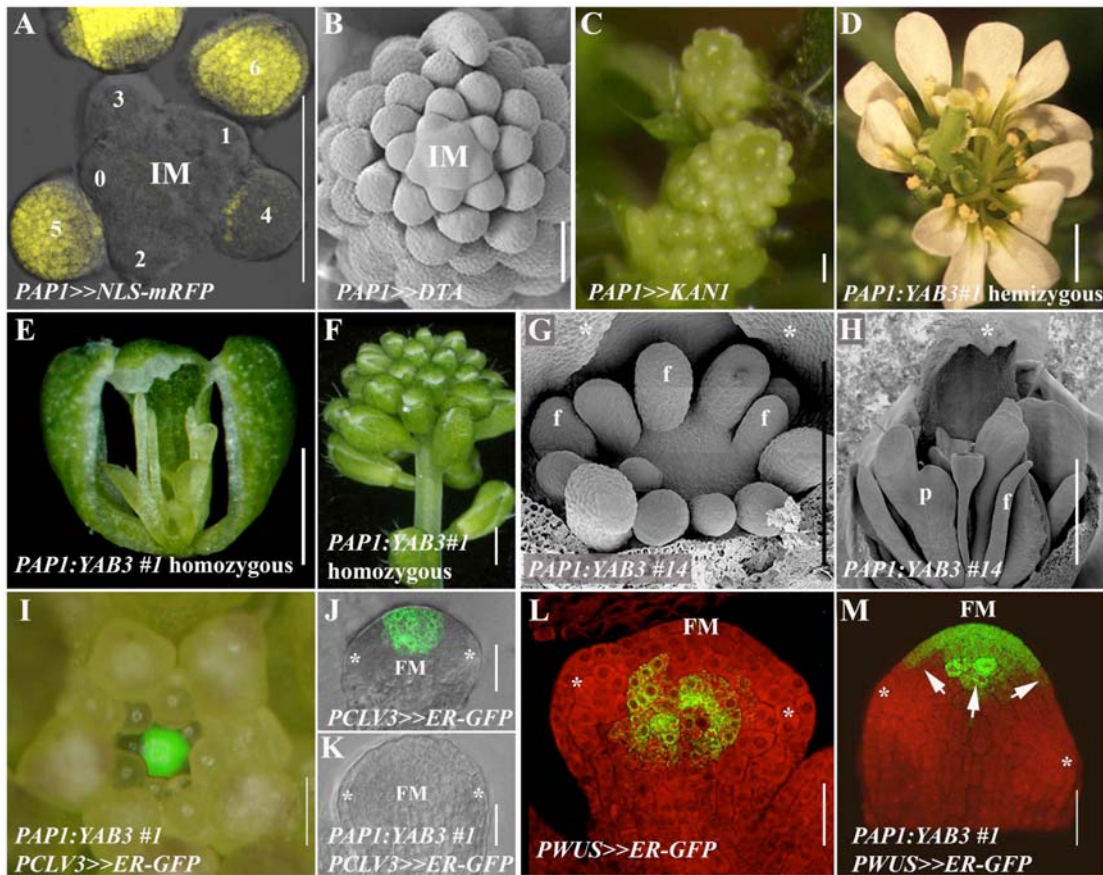

**Supplemental Figure 4. Unique responses of flower meristems to ectopic YAB1 expression.**

**A:** Transverse section of an inflorescence showing the onset of *PAPI>>NLS-mRFP* expression. **B:** Top view of an *PAPI>>DTA* inflorescence. Note the ordered phyllotaxis of the aborted flower primordia. **C:** Aerial view of *PAPI>>KANI* inflorescences. **D:** Flower of a weak *PAPI:YAB3* hemizygous line with numerous petals and stamens and malformed, but fertile, carpels. **E-H:** Strong *PAPI:YAB3* lines. Flower (**E**; one sepal removed) and inflorescence (**F**) of a homozygous progeny of the weak line in (**D**). Mildly affected sepals are followed by retarded, filamentous petals. (**G**) A SEM micrograph of a strong *PAPI:YAB3* line flower. Numerous petals are produced that are arrested in development as is the central flower meristem. (**H**) Older flower (with three sepals removed) of the same shoot from which **G** was obtained. The expanding petals display variable shapes and sizes and are positioned in a disorganized fashion. **I-K:** Expression of *PCLV3>>ER-GFP*. Apices are of wild-type (**J**) and *PAPI:YAB3* plants (**I**, **K**). Note the absence of *PCLV3>>ER-GFP* expression in the *PAPI:YAB3* floral meristems. **L,M:** Expression of *PWUS>>ER-GFP* in wild-type (**L**) and *PAPI:YAB3* (**M**) flowers. Note the expansion (indicated by the arrows) of *PWUS>>ER-GFP* expression in *PAPI:YAB3* flowers. Bars are 100 $\mu$ m in A to C, F and I, 1mm in D and E and 50 $\mu$ m in J to M. Numbers represent the order of flower initiation. IM- inflorescence meristem, FM- floral meristem, \* - sepals, pe - petals, f- filaments.

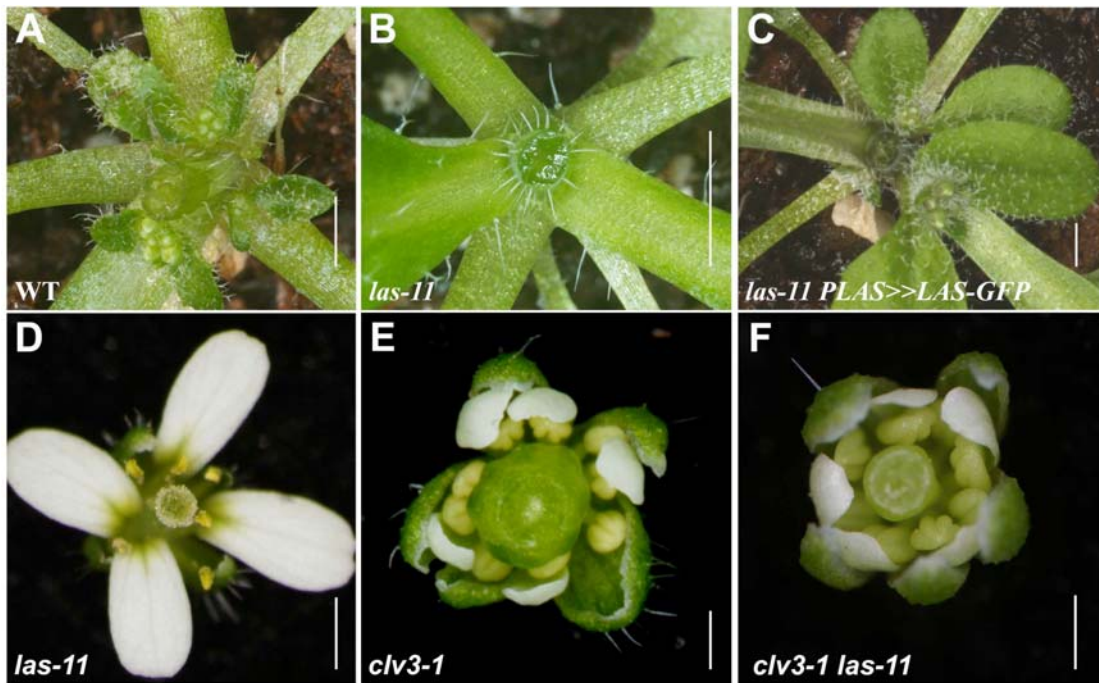

**Supplemental Figure 5. Additional analyses of *lateral suppressor*.**

**A-C:** Complementation of *las* by *PLAS>>LAS-GFP*. Axillary shoots are initiated in the axils of wild type rosettes (**A**), are missing from axils of *las-11* mutant leaves (**B**), and are restored in axils of *las-11 PLAS>>LAS-GFP* leaves (**C**). The primary stems were removed prior to photography. **D-F:** Additive interaction between *las* and *clv3*. **D:** Top view of a *clv3-1* mutant flower. **E:** Top view of a *las-11* mutant flower, indistinguishable from wild type. **F:** Top view of a *clv3-1 las-11* double mutant flower, indistinguishable from *clv3-1*. Bars are 1cm in **A-C** and 1mm in **D-F**.

**Supplemental Table 1: Mean number <sup>a</sup> of floral organs in plants with altered *YAB1* expression.**

| <b>Genotype</b>                      | <b>Sepal # ± SD</b> | <b>Petal # ± SD</b> | <b>Stamen # ± SD</b> | <b>Filament <sup>b</sup> # ± SD</b> | <b>Carpel # ± SD</b> |
|--------------------------------------|---------------------|---------------------|----------------------|-------------------------------------|----------------------|
| wild type (Ler)                      | 4 ± 0               | 4 ± 0               | 5.95 ± 0.2           | 0                                   | 2 ± 0                |
| <i>PFIL</i> >> <i>YAB3-GFP</i>       | 4 ± 0               | 3.96 ± 0.2          | 5.91 ± 0.5           | 0                                   | 2 ± 0                |
| <i>PFIL</i> >> <i>GFP-FIL</i>        | 4 ± 0               | 4 ± 0               | 5.91 ± 0.2           | 0                                   | 2 ± 0                |
| <i>fil-8</i>                         | 4.6 ± 0.8           | 1 ± 0.9             | 1.91 ± 1.2           | 2.2 ± 1.7                           | 2.7 ± 0.8            |
| <i>fil-8 yab3-2</i>                  | 3.8 ± 0.7           | 0                   | 0                    | 1.45 ± 0.97                         | 2 ± 0                |
| <i>fil-8 PFIL</i> >> <i>YAB3-GFP</i> | 4.3 ± 0.58          | 1.9 ± 1.58          | 5.8 ± 0.8            | 0.13 ± 0.43                         | 2 ± 0                |
| <i>PAP1:Y3</i> hemizygous            | 4 ± 0               | 7.2 ± 1.38          | 15.3 ± 1.8           | 0                                   | 3.54 ± 1.1           |
| <i>PAP3:Y3</i> hemizygous            | 4 ± 0               | 4 ± 0.6             | 5 ± 1.66             | 2 ± 1.38                            | 2.12 ± 0.3           |
| <i>PAP3</i> >> <i>GFP-FIL</i>        | 4 ± 0               | 3.6 ± 1.35          | 3 ± 1.3              | 2.17 ± 1.5                          | 2.4 ± 0.71           |
| <i>PANT</i> >> <i>amiR-YAB1</i>      | 4.2 ± 0.7           | 0                   | 0                    | 3.9 ± 1                             | 2 ± 0.2              |
| <i>PAP1</i> >> <i>amiR-YAB1</i>      | 4.13 ± 0.81         | 0                   | 0                    | 4.6 ± 1.5                           | 2 ± 0.26             |
| <i>PAP3</i> >> <i>amiR-YAB1</i>      | 4 ± 0               | 4 ± 0               | 5.56 ± 0.5           | 0                                   | 2 ± 0                |

<sup>a</sup> For each genotype, 5 flowers at positions ranging from 6<sup>th</sup> to 15<sup>th</sup> of the main shoot, from 6 different plants (30 flowers in total) were counted.

<sup>b</sup> Filamentous organs initiated at the 2<sup>nd</sup> or 3<sup>rd</sup> floral whorls.

**Supplemental Table 2: *Arabidopsis* mutant and transgenic lines used in this study.**

| <b>Genotype</b>                              | <b>GB accession or AGI numbers</b> | <b>Source/ reference</b>                       |
|----------------------------------------------|------------------------------------|------------------------------------------------|
| <i>clv3-1</i>                                | At2g27250                          | Eliot Meyerowitz (CalTech)                     |
| <i>las-11</i>                                | At1g55580                          | Present study                                  |
| <i>fil-8</i>                                 | At2g45190                          | Kumaran et al., 2002                           |
| <i>yab3-2</i>                                | At4g00180                          | Kumaran et al., 2002                           |
| <i>PAP1:LhG4</i>                             | At1g69120                          | Emery et al., 2003                             |
| <i>PAP3:LhG4</i>                             | At3g54340                          | Alvarez et al., 2006                           |
| <i>PANT:LhG4</i>                             | At4g37750                          | Schoof et al., 2000                            |
| <i>PCLV3:LhG4</i>                            | At2g27250                          | Present study                                  |
| <i>PCRC:LhG4</i>                             | At1g69180                          | Pekker et al., 2005                            |
| <i>PFIL:LhG4</i>                             | At2g45190                          | Present study                                  |
| <i>PLAS:LhG4</i>                             | At1g55580                          | Present study                                  |
| <i>PRBE:LhG4</i>                             | At5g06070                          | Present study                                  |
| <i>PWUS:LhG4</i>                             | At2g17950                          | Gross-Hardt et al., 2002                       |
| <i>OP: ER-GFP</i>                            | U87974                             | Friedrich Kragler (VU)                         |
| <i>OP:NLS(LHP1)-GFP</i>                      | At5g17690                          | Gideon Grafi (BGU)                             |
| <i>OP:NLS (VirE2)- mRFP1</i>                 | AAF77177<br>DD220331               | Patricia Zambryski (UCB)<br>Roger Tsien (UCSD) |
| <i>OP:DTA</i>                                | AY820132                           | Chuck Gasser (UCD)                             |
| <i>OP:KAN1</i>                               | At5g16560                          | Pekker et al., 2005                            |
| <i>OP:miR165b</i>                            | At4g00885                          | Alvarez et al., 2006                           |
| <i>OP:LAS-GFP</i>                            | At1g55580                          | Present study                                  |
| <i>OP:YAB3; OP:GFP-YAB3;<br/>OP:YAB3-GFP</i> | At4g00180                          | Present study                                  |
| <i>OP: FIL; OP:GFP-FIL;<br/>OP:FIL-GFP</i>   | At2g45190                          | Present study                                  |
| <i>OP:amiR-YAB1</i>                          | Supplemental Figure 3              | Present study                                  |
| <i>PAP1:YAB3</i>                             | At1g69120 /At4g00180               | Present study                                  |
| <i>PAP3:YAB3</i>                             | At3g54340/ At4g00180               | Present study                                  |

Supplemental Table 3: Primers used for construction of responder and driver lines.

| Name and source                              | Forward                                 | Reverse                                |
|----------------------------------------------|-----------------------------------------|----------------------------------------|
| <b>PRBE (1500bp 5' upstream region)</b>      | 5'AAACTGCAGTTTCAAGC<br>AGTCTGATCACG     | 5'AAAGGATCCCAGTAGAAG<br>AAGTTAAGGTG    |
| <b>PFIL (4000bp 5' upstream region)</b>      | 5'AAACCTAGGTGCCAAGT<br>AGCAAGCATAGGGC3' | 5'AAACTCGAGGATCCAAGCT<br>TATCATGGTGATG |
| <b>PLAS (3000bp 5' upstream region)</b>      | 5'AAACTGCAGGCCACCTA<br>ATGAAGTGAC       | 5'AAACCTAGGAGATGAAGTT<br>GGACCGACCAA   |
| <b>PAP1 (1800bp 5' upstream region)</b>      | 5'AAAGAATTCCTCCGGATC<br>TCCATAT         | 5'AAAGGATCCGATCCCCAGC<br>TTCTG         |
| <b>PAP3 (500bp 5' upstream region)</b>       | 5'AAAGGTACCCCTTTGAC<br>GTTTACAAAC       | 5'AAAAAGCTTTATCGATTTT<br>GAACCCATT     |
| <b>NLS (LHP1)</b>                            | 5'AAAGTCGACATCCATGG<br>GAAAAAAACAGAATG  | 5'AAACTCGAGGATGAGCTT<br>CATCTTCTGGA    |
| <b>NLS (VirE2)</b>                           | 5'AAAGTCGACATGGAGCA<br>GAAGCTGAT        | 5'AAACTCGAGCGAATTCATC<br>TCTCTCGCGT    |
| <b>mRFP-1</b>                                | 5'AAAGGATCCATGGCCTC<br>CTCCGAGGA        | 5'AAAAGATCTTTAGGCGCCG<br>GTGGA         |
| <b><i>Diphtheria toxin A</i></b>             | 5'AAAAACTCGAGATGGAA<br>AACTTTTCTTCG     | 5'AAAAAGCTTTCATCGCCTG<br>ACACGATT      |
| <b><i>LAS</i> for N terminal GFP fusion</b>  | 5'AAACTCGAGATGCTTAC<br>TTCCTTCAA        | 5'AAAGGATCCTCATTTCAC<br>GACGAAACG      |
| <b><i>LAS</i> for C terminal GFP fusion</b>  | 5'AAAGGATCCGCTTTCCA<br>CGACGAAACGGAGA   | 5'AAACTCGAGTCAAATGCTT<br>ACTTCTTCAAAT  |
| <b><i>YAB3</i></b>                           | 5'AAACTCGAGAATGTCGA<br>GCATGTCCAT       | 5'AAAGGATCCGCGTTATGGG<br>CCAC          |
| <b><i>YAB3</i> for N terminal GFP fusion</b> | 5'AAACTCGAGAATGTCGA<br>GCATGTCCAT       | 5'AAAGGATCCGCGTTATGGG<br>CCACCCC       |
| <b><i>YAB3</i> for C terminal GFP fusion</b> | 5'AAACTCGAGATGTCGAG<br>CATGTCCA         | 5'AAAGGATCCTGGGCCACCC<br>CAACGTTGG     |
| <b><i>FIL</i></b>                            | 5'AAACTCGAGATGTCTAT<br>GTCGTCTATGTC     | 5'AAACCATGGTACCTTAATA<br>AGGAGTCACACCA |
| <b><i>FIL</i> for N terminal GFP fusion</b>  | 5'AAACTCGAGATGTCTAT<br>GTCGTCTATG       | 5'AAAGGATCCTTAATAAGGA<br>GTCACACC      |
| <b><i>FIL</i> for C terminal GFP fusion</b>  | 5'AAACTCGAGATGTCTAT<br>GTCGTCTATG       | 5'AAAGGATCCGCATAAGGA<br>GTCACACCAAC    |



**References:**

- Alvarez, J.P., Pekker, I., Goldshmidt, A., Blum, E., Amsellem, Z., and Eshed, Y.** (2006). Endogenous and synthetic microRNAs stimulate simultaneous, efficient, and localized regulation of multiple targets in diverse species. *Plant Cell* **18**: 1134 -1151.
- Emery, J.F., Floyd, S.K., Alvarez, J., Eshed, Y., Hawker, N.P., Izhaki, A., Baum, S.F., and Bowman, J.L.** (2003). Radial patterning of *Arabidopsis* shoots by class III HD-ZIP and KANADI genes. *Curr. Biol.* **13**: 1768–1774.
- Gross-Hardt, R., Lenhard, M., and Laux, T.** (2002). WUSCHEL signaling functions in interregional communication during *Arabidopsis* ovule development. *Genes Dev.* **16**: 1129–1138.
- Kumaran, M. K., Bowman, J.L., and Sundaresan, V.** (2002). YABBY genes mediate down-regulation of KNOTTED-like genes during leaf development in *Arabidopsis thaliana*. *Plant Cell* **14**:2761-2770.
- Pekker, I., Alvarez, J.P. and Eshed, Y.** (2005). Auxin response factors mediate *Arabidopsis* organ asymmetry via modulation of KANADI activity. *Plant Cell* **17**: 2899–2910.
- Schoof, H., Lenhard, M., Haecker, A., Mayer, K.F., Jürgens G., and Laux T.** (2000). The stem cell population of *Arabidopsis* shoot meristems is maintained by a regulatory loop between the CLAVATA and WUSCHEL genes. *Cell.* **100**: 635-644.
